# Supplementary material for: The prevalence and common risk indicators of root caries and oral health service utilization pattern among adults, a cross-sectional study
Source: PeerJ journal article supplement (doi:10.7717/peerj.16458), 2023-11-22
Supplement: Questionnaire.pdf [file Questionnaire.pdf]

The 4th National Oral Health Questionnaire 2015  
(Adult)

2015 年第四次全国口腔健康调查问卷 (成人)

Respondent ID number

respondent name

被调查者 ID 号: □□□□□□□□□□□□

被调查者姓名: \_\_\_\_\_

date

调查日期: 201□年□□月□□日

调查员编号: □ investigator number

要求: 请在选择题相应选项前面的“□”内划“√”。

Requirement: Please mark "√" in the "□" in front of the corresponding option of the multiple-choice question.

1. 您的最高学历是? (只选一个答案) What's your 'highest degree?

- never 1)  没有上过学 2)  小学 primary school 3)  初中 junior high school 4)  高中 High school  
5)  中专 6)  大专 college 7)  本科 Bachelor 8)  硕士及以上 Master degree and above  
Second ary school

2. 您平时进食以下食品或饮料的频率如何? (每小题选一个答案)

How often do you eat the following foods or drinks? (one answer per question)

|  | everyday<br>每天<br>≥2 次 | everyday<br>每天<br>1 次 | every<br>每周<br>2-6 次 | every<br>每周<br>1 次 | every<br>每月<br>1-3 次 | 1<br>很少/<br>seldom<br>从不 |
|--|------------------------|-----------------------|----------------------|--------------------|----------------------|--------------------------|
|--|------------------------|-----------------------|----------------------|--------------------|----------------------|--------------------------|

Sweet snacks (biscuits, cakes, breads) and Candy (chocolate, sugary gum) 甜点心 (饼干、蛋糕、面包) 及糖果 (巧克力、含糖口香糖)

|                          |                          |                          |                          |                          |                          |                          |
|--------------------------|--------------------------|--------------------------|--------------------------|--------------------------|--------------------------|--------------------------|
| <input type="checkbox"/> | <input type="checkbox"/> | <input type="checkbox"/> | <input type="checkbox"/> | <input type="checkbox"/> | <input type="checkbox"/> | <input type="checkbox"/> |
|--------------------------|--------------------------|--------------------------|--------------------------|--------------------------|--------------------------|--------------------------|

Sweet drinks (sugar water, cola, juices such as lemonade) 甜饮料 (糖水、可乐等碳酸饮料、果汁、苹果汁等果糖柠檬水、鲜榨果汁)

|                          |                          |                          |                          |                          |                          |                          |
|--------------------------|--------------------------|--------------------------|--------------------------|--------------------------|--------------------------|--------------------------|
| <input type="checkbox"/> | <input type="checkbox"/> | <input type="checkbox"/> | <input type="checkbox"/> | <input type="checkbox"/> | <input type="checkbox"/> | <input type="checkbox"/> |
|--------------------------|--------------------------|--------------------------|--------------------------|--------------------------|--------------------------|--------------------------|

3) 加糖的牛奶、酸奶、奶粉、茶、豆浆、咖啡

|                          |                          |                          |                          |                          |                          |                          |
|--------------------------|--------------------------|--------------------------|--------------------------|--------------------------|--------------------------|--------------------------|
| <input type="checkbox"/> | <input type="checkbox"/> | <input type="checkbox"/> | <input type="checkbox"/> | <input type="checkbox"/> | <input type="checkbox"/> | <input type="checkbox"/> |
|--------------------------|--------------------------|--------------------------|--------------------------|--------------------------|--------------------------|--------------------------|

Sugared milk, yogurt, milk powder, tea, Soy milk, coffee

3. 您吸烟吗? (只选一个答案) Do you smoke? (If you choose 2 or 3, you will not answer questions 4 and 5.)

- 1)  吸烟 yes 2)  从不吸 never 3)  已戒烟 (选 2 或 3 项者不回答第 4、5 题) Quit smoking

4. 您吸烟多少年了? \_\_\_\_\_ 年。(请填写一个整数, 不知道或拒绝回答的填写“N”) How many years have you been smoking?—years

5. 最近一个月内, 您平均每天吸多少支烟? (只选一个答案)

- 1)  ≤1 支/天 2)  1-5 支/天 3)  6-10 支/天  
4)  11-20 支/天 5)  21-40 支/天 6)  ≥41 支/天  
number/per day How many cigarettes do you smoke on average per day in the last month?

6. 您喝白酒吗? (只选一个答案) Do you drink wine?

- 1)  每天喝 every day 2)  每周喝 every week 3)  很少喝 seldom 4)  从不喝 never 5)  已戒酒 quit alcohol

7. 您使用下列方法清洁牙齿吗? (每小题选一个答案) Do you use the following methods to clean your teeth? (Select one answer for each question)

- |                      | 6<br>每天<br>≥2 次          | 5<br>每天<br>1 次           | 4<br>每周<br>2-6 次         | 3<br>每周<br>1 次           | 2<br>每月<br>1-3 次         | 1<br>很少/<br>seldom<br>从不 |
|----------------------|--------------------------|--------------------------|--------------------------|--------------------------|--------------------------|--------------------------|
| 1) 刷牙 Brushing teeth | <input type="checkbox"/> | <input type="checkbox"/> | <input type="checkbox"/> | <input type="checkbox"/> | <input type="checkbox"/> | <input type="checkbox"/> |
| 2) 牙签 toothpick      | <input type="checkbox"/> | <input type="checkbox"/> | <input type="checkbox"/> | <input type="checkbox"/> | <input type="checkbox"/> | <input type="checkbox"/> |
| 3) 牙线 Dental floss   | <input type="checkbox"/> | <input type="checkbox"/> | <input type="checkbox"/> | <input type="checkbox"/> | <input type="checkbox"/> | <input type="checkbox"/> |
- never/seldom  
≥2 times per day 1-3 times per day 2-6 times a week 3 times a week

Do you use toothpaste to brush your teeth?

8. 您使用牙膏刷牙吗? (只选一个答案)

- 1) 是 2) 否 3) 不知道 (选2或3项者不回答第9题)

yes no I don't know

9. 您使用含氟牙膏刷牙吗? (只选一个答案) Are you brushing your teeth with fluoride toothpaste?

- 1) 是 2) 否 3) 不知道

yes no I don't know

10. 您看过牙吗? (只选一个答案) Have you visited your dentist?

- 1) 看过 2) 从没看过牙 (选2项者不回答第11至15题)

yes never

11. 您最近一次看牙距现在多长时间? (只选一个答案) How long have you been visiting your dentist last time?

in 6 month 1) 6个月以内 2) 6个月至12个月 (选1或2项者不回答第16题)

- 3) 12个月以上 (选3项者不回答第12至15题) 6-12months

more than 12 months

12. 您最近一次看牙的主要原因是什么? (只选一个答案) reason to visit dentist

- 1) 咨询检查 2) 预防 3) 治疗 4) 不知道

inspection prevention treatment don't know

13. 在过去的一年内您看牙的总费用是 \_\_\_\_\_ 元? (请填写一个整数, 不知道或拒绝回答的填写“N”)

total cost to pay for dental care, you can refuse to answer filling N

14. 在上述看牙费用中, 您个人需要支付的比例是 \_\_\_\_\_ %。(请填写一个整数, 不知道或拒绝回答的填写“N”)

The proportion you need to pay personally is%you can refuse to answer filling N

15. 您上一次看牙, 费用是否可报销? (可多选)

is the fee reimbursable?

- 1) 城镇职工基本医疗保险 2) 城镇居民基本医疗保险

- 3) 新型农村合作医疗 4) 商业保险

different insurances

- 5) 公费医疗

- 6) 其他途径报销

- 7) 全部自费 (没有报销)

16. 您过去12个月内没有看过牙的原因是? (可多选)

The reason you haven't visit dentists in the past 12 months is?

- 1) 牙齿没有问题

- 2) 牙病不重

- 3) 没有时间

- 4) 经济困难, 看不起牙

- 5) 看牙不能报销

- 6) 附近没有牙医

- 7) 害怕传染病

- 8) 害怕看牙疼痛

reasons. do not translate because it was not the

- 9) 很难找到信得过的牙医

- 10) 挂号太难

content of my article

- 11) 其它原因

17. 您是否有以下的医疗保障? (每小题选一个答案)

Do you have the following medical coverage?

是 1

否 2

- 1) 城镇职工基本医疗保险

- 2) 城镇居民基本医疗保险

- 3) 新型农村合作医疗

- 4) 商业保险

- 5) 公费医疗

different insurance

闪电PDF编辑器

<http://bianji.sdpdf.net>

18. 在过去的 12 个月内, 您洗过牙吗? **Have you washed your teeth in the past 12 months?**  
 1) 是 2) 否 (选 2 项者不回答第 19 题)

yes no  
 19. 您洗牙费用的报销方式是 (可多选) **The reimbursement method for your dental cleaning costs is**  
 1) 城镇职工基本保险 2) 城镇居民基本医疗保险  
 3) 新型农村合作医疗 4) 商业保险  
 5) 公费医疗 6) 其他途径报销 **different type of insurance**  
 7) 全部自费 (没有报销)

20. 口腔问题对您以下方面的影响有多大? (55-64 岁年龄组不回答此题, 每小题选一个答案)

How much does the oral problem affect you in the following areas? 3 4 5

|                                      | 很经常                      | 经常                       | 有时                       | 很少                       | 无                        |
|--------------------------------------|--------------------------|--------------------------|--------------------------|--------------------------|--------------------------|
| 1) 您经常因为牙齿或假牙的原因限制所吃食物的种类和数量吗?       | <input type="checkbox"/> | <input type="checkbox"/> | <input type="checkbox"/> | <input type="checkbox"/> | <input type="checkbox"/> |
| 2) 您在咬或咀嚼食物时有困难吗?                    | <input type="checkbox"/> | <input type="checkbox"/> | <input type="checkbox"/> | <input type="checkbox"/> | <input type="checkbox"/> |
| 3) 您吞咽食物时经常会感到不舒服或困难吗?               | <input type="checkbox"/> | <input type="checkbox"/> | <input type="checkbox"/> | <input type="checkbox"/> | <input type="checkbox"/> |
| 4) 您的牙齿或假牙妨碍您说话吗?                    | <input type="checkbox"/> | <input type="checkbox"/> | <input type="checkbox"/> | <input type="checkbox"/> | <input type="checkbox"/> |
| 5) 您吃东西时经常感到口腔内不舒服吗?                 | <input type="checkbox"/> | <input type="checkbox"/> | <input type="checkbox"/> | <input type="checkbox"/> | <input type="checkbox"/> |
| 6) 您经常因为牙齿或假牙的原因而限制自己与他人的交往吗?        | <input type="checkbox"/> | <input type="checkbox"/> | <input type="checkbox"/> | <input type="checkbox"/> | <input type="checkbox"/> |
| 7) 您经常对您牙齿、牙龈或假牙的外观感到不满意或不愉快吗?       | <input type="checkbox"/> | <input type="checkbox"/> | <input type="checkbox"/> | <input type="checkbox"/> | <input type="checkbox"/> |
| 8) 您经常用药物缓解口腔的疼痛或不适吗?                | <input type="checkbox"/> | <input type="checkbox"/> | <input type="checkbox"/> | <input type="checkbox"/> | <input type="checkbox"/> |
| 9) 您经常担心或关注您的牙齿、牙龈或假牙的问题吗?           | <input type="checkbox"/> | <input type="checkbox"/> | <input type="checkbox"/> | <input type="checkbox"/> | <input type="checkbox"/> |
| 10) 您经常因为牙齿、牙龈或假牙的问题而在别人面前感到紧张或不自在吗? | <input type="checkbox"/> | <input type="checkbox"/> | <input type="checkbox"/> | <input type="checkbox"/> | <input type="checkbox"/> |
| 11) 您经常因为牙齿或假牙的问题而在别人面前吃东西时感到不舒服吗?   | <input type="checkbox"/> | <input type="checkbox"/> | <input type="checkbox"/> | <input type="checkbox"/> | <input type="checkbox"/> |
| 12) 您的牙齿或牙龈对冷、热或甜刺激敏感吗?              | <input type="checkbox"/> | <input type="checkbox"/> | <input type="checkbox"/> | <input type="checkbox"/> | <input type="checkbox"/> |

How do you think of your overall health?

21. 您对自己的全身健康状况评价如何? (只选一个答案)

very good 1) 很好 good 2) 较好 3) 一般 not bad  
 4) 较差 5) 很差 very poor

bad

22. 您对自己的牙齿和口腔状况评价如何? (只选一个答案) **How do you rate your teeth and oral condition?**

very good 1) 很好 good 2) 较好 3) 一般 not bad  
 4) 较差 5) 很差

poor

23. 您对以下说法的看法如何？(每小题选一个答案)

|                                                                            |                             | 1                        | 2                        | 8                        | 9                        |
|----------------------------------------------------------------------------|-----------------------------|--------------------------|--------------------------|--------------------------|--------------------------|
| whether learn about the oral health knowledge or not?                      |                             | 同意                       | 不同意                      | 无所谓                      | 不知道                      |
| no translation<br>because<br>this part weren't<br>invlved in my<br>article | 1) 口腔健康对自己的生活很重要            | <input type="checkbox"/> | <input type="checkbox"/> | <input type="checkbox"/> | <input type="checkbox"/> |
|                                                                            | 2) 定期口腔检查是十分必要的             | <input type="checkbox"/> | <input type="checkbox"/> | <input type="checkbox"/> | <input type="checkbox"/> |
|                                                                            | 3) 牙齿的好坏是天生的，与自己的<br>保护关系不大 | <input type="checkbox"/> | <input type="checkbox"/> | <input type="checkbox"/> | <input type="checkbox"/> |
|                                                                            | 4) 预防牙病首先靠自己                | <input type="checkbox"/> | <input type="checkbox"/> | <input type="checkbox"/> | <input type="checkbox"/> |

24. 你认为下面的说法是否正确？(每小题选一个答案)

|                         | 1                        | 2                        | 8                        |
|-------------------------|--------------------------|--------------------------|--------------------------|
|                         | 正确                       | 不正确                      | 不知道                      |
| 1) 刷牙时牙龈出血是正常的          | <input type="checkbox"/> | <input type="checkbox"/> | <input type="checkbox"/> |
| 2) 细菌可以引起牙龈发炎           | <input type="checkbox"/> | <input type="checkbox"/> | <input type="checkbox"/> |
| 3) 刷牙对预防牙龈出血 <b>没有用</b> | <input type="checkbox"/> | <input type="checkbox"/> | <input type="checkbox"/> |
| 4) 细菌可以引起龋齿             | <input type="checkbox"/> | <input type="checkbox"/> | <input type="checkbox"/> |
| 5) 吃糖可以导致龋齿             | <input type="checkbox"/> | <input type="checkbox"/> | <input type="checkbox"/> |
| 6) 氟化物对保护牙齿 <b>没有用</b>  | <input type="checkbox"/> | <input type="checkbox"/> | <input type="checkbox"/> |
| 7) 窝沟封闭可保护牙齿            | <input type="checkbox"/> | <input type="checkbox"/> | <input type="checkbox"/> |
| 8) 口腔疾病可能会影响全身健康        | <input type="checkbox"/> | <input type="checkbox"/> | <input type="checkbox"/> |

Have you ever had the following chronic diseases diagnosed by your doctor?  
25. 你是否曾经患过由医生确诊过的下列慢性病？(可多选)

- |               |                                 |                                            |                                              |
|---------------|---------------------------------|--------------------------------------------|----------------------------------------------|
| Stroke        | 1) <input type="checkbox"/> 中风  | 2) <input type="checkbox"/> 糖尿病 diabetes   | 3) <input type="checkbox"/> 高血压 hypertension |
| heart disease | 4) <input type="checkbox"/> 心脏病 | 5) <input type="checkbox"/> 慢性阻塞性肺部疾病 COPD | 6) <input type="checkbox"/> 其它，请注明_____      |
| none          | 7) <input type="checkbox"/> 没有  | 8) <input type="checkbox"/> 不知道 dont know  | other                                        |

26. 您家里共同生活的有几口人？\_\_\_\_\_ 人（请填写一个整数，拒绝回答的填写“N”）；

How many people live in your family? \_\_\_\_

27. 您家在过去的 12 个月内的总收入大约是多少？\_\_\_\_\_ 万元/年（请填写一个整数，拒绝回答的填写“N”）。

What is the total income of your family in the past 12 months?

十分感谢您的合作！

Thank you so much for your cooperation!

闪电PDF编辑器

<http://bianji.sdpdf.net>
